# Supplementary material for: From adsorbents to electrode materials: facile hydrothermal synthesis of montmorillonite/polyaniline/metal oxide (hydroxide) composites
Source: Royal Society of Chemistry journal article supplement (doi:10.1039/c5nj03734d), 2016-01-01
Supplement: c5nj03734d1.pdf [file c5nj03734d1.pdf]

# From adsorbents to electrode materials: Facile hydrothermal synthesis of montmorillonite/polyaniline/metal oxide (hydroxide) composites

Weibing Xu<sup>a,b</sup>, Bin Mu<sup>a</sup>, Aiqin Wang<sup>a\*</sup>

<sup>a</sup> *State Key Laboratory of Solid Lubrication, Center of Eco-Materials and Green Chemistry, Lanzhou Institute of Chemical Physics, Chinese Academy of Sciences, Lanzhou 730000, China.*

<sup>b</sup> *University of the Chinese Academy of Sciences, Beijing 100049, P.R. China.*

**Table S1** The absorption capacitance of MMT/PANI-x for Co<sup>2+</sup>, Fe<sup>2+</sup>, Ni<sup>2+</sup> and the specific capacitance of MMT/PANI-x/Co<sub>3</sub>O<sub>4</sub> (Fe<sub>2</sub>O<sub>3</sub>, and Ni(OH)<sub>2</sub>).

| Sample       | Absorption capacitor (mg g <sup>-1</sup> ) |                  |                  | Capacitance (F g <sup>-1</sup> ) <sup>a</sup> |                                |                     |
|--------------|--------------------------------------------|------------------|------------------|-----------------------------------------------|--------------------------------|---------------------|
|              | Co <sup>2+</sup>                           | Fe <sup>2+</sup> | Ni <sup>2+</sup> | Co <sub>3</sub> O <sub>4</sub>                | Fe <sub>2</sub> O <sub>3</sub> | Ni(OH) <sub>2</sub> |
| MMT/PANI-0.8 | 118.7                                      | 106.7            | 99.1             | 109                                           | 22                             | 58                  |
| MMT/PANI-1.0 | 148.9                                      | 169.4            | 113.8            | 106                                           | 45                             | 61                  |
| MMT/PANI-1.2 | 152.7                                      | 187.8            | 117.9            | 83                                            | 53                             | 74                  |
| MMT/PANI-1.4 | 210.4                                      | 227.8            | 175.6            | 127                                           | 66                             | 145                 |
| MMT/PANI-1.6 | 198.7                                      | 148.5            | 166.1            | 79                                            | 47                             | 123                 |

<sup>a</sup>The capacitance is calculated according to the equation (1) using GCD curve at current density 0.25 A g<sup>-1</sup>.

\* Corresponding author. Tel.: +86 931 4968118; fax: +86 931 8277088.  
*E-mail:* aqwang@licp.cas.cn (A. Wang).

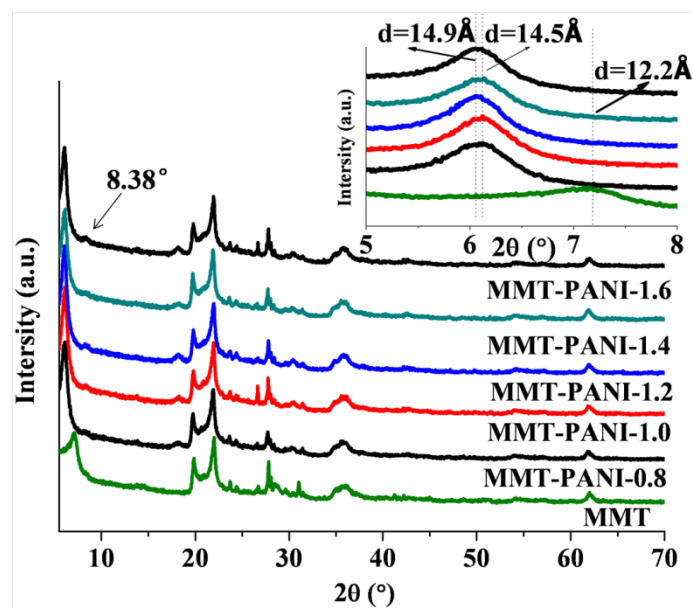

Figure S1 XRD patterns of MMT and MMT/PANI-x composites.

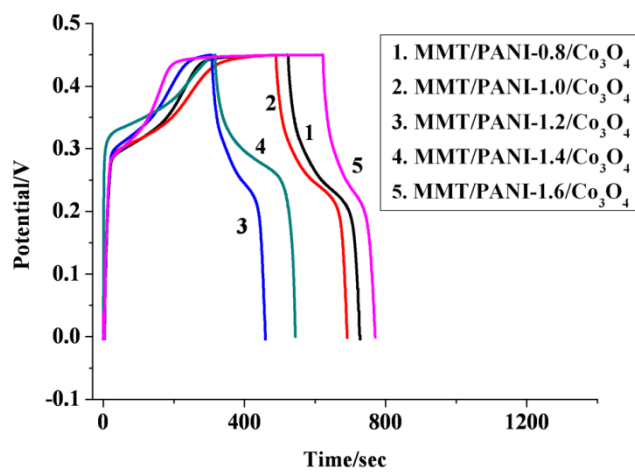

Figure S2 GCD curves of MMT/PANI-0.8 ~ 1.6/ $\text{Co}_3\text{O}_4$  composites at current density

$0.25 \text{ A g}^{-1}$  in 1.0 M KOH.

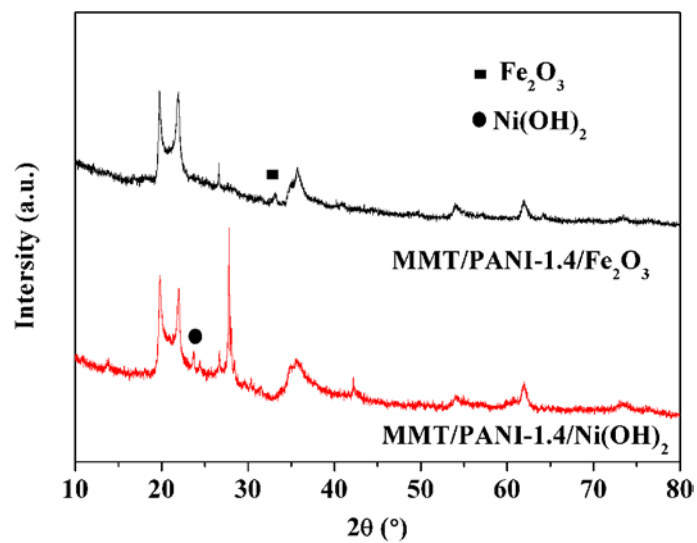

**Figure S3** XRD patterns of MMT/PANI-1.4/Ni(OH)<sub>2</sub> and MMT/PANI-1.4/Fe<sub>2</sub>O<sub>3</sub> composites.

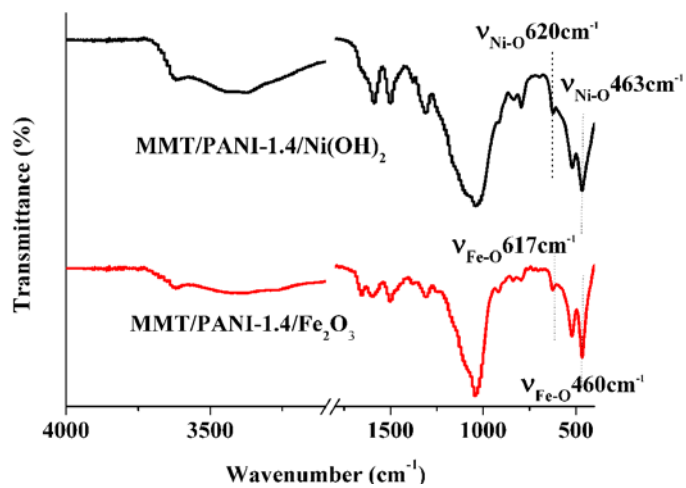

**Figure S4** FTIR spectra of MMT/PANI-1.4/Ni(OH)<sub>2</sub> and MMT/PANI-1.4/Fe<sub>2</sub>O<sub>3</sub> composites.

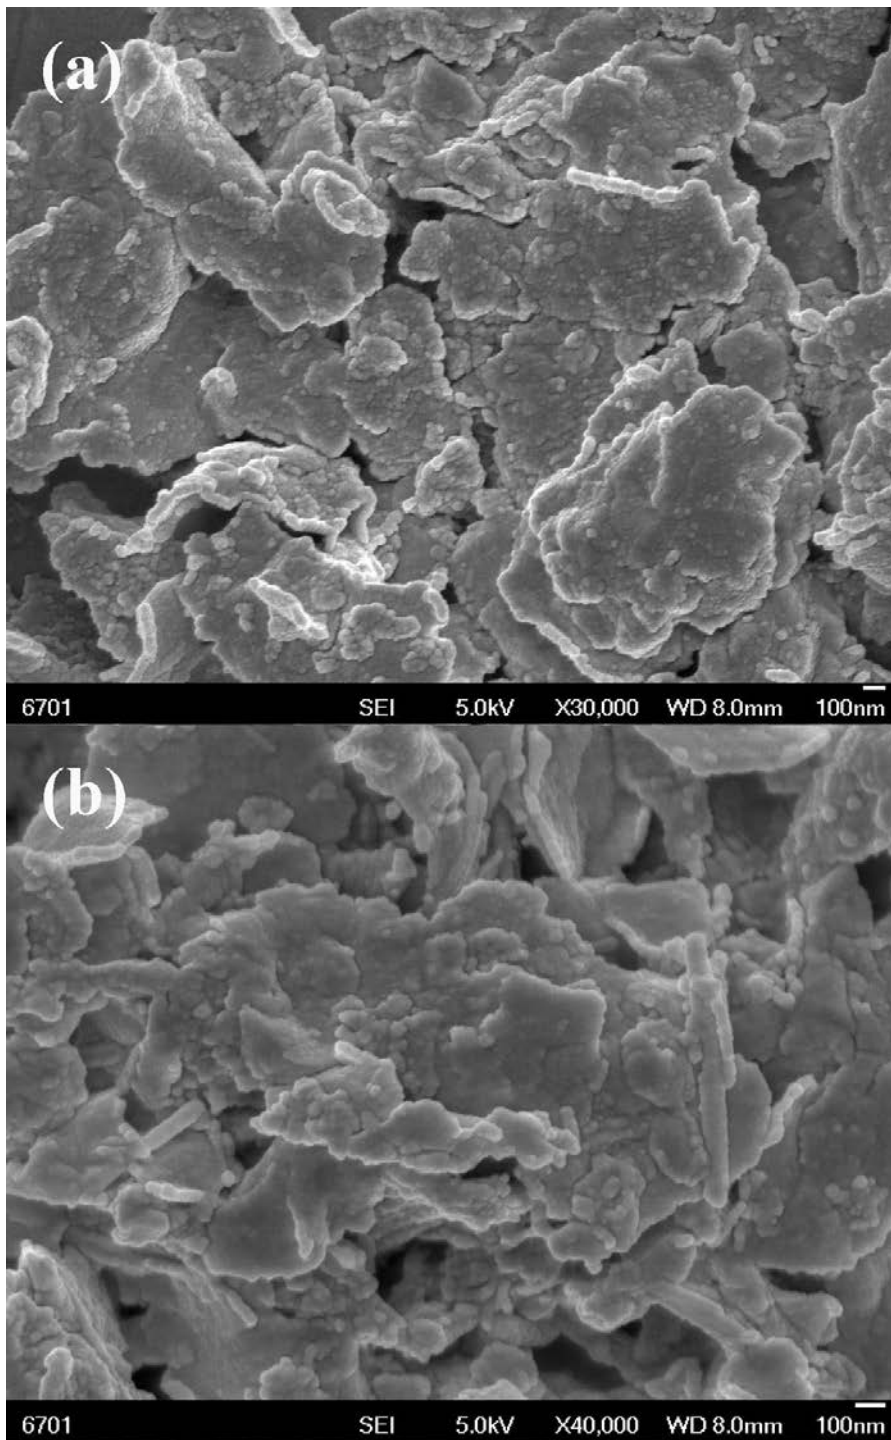

**Figure S5** SEM images of (a) MMT/PANI-1.4/Fe<sub>2</sub>O<sub>3</sub> and (b) MMT/PANI-1.4/Ni(OH)<sub>2</sub> composites.

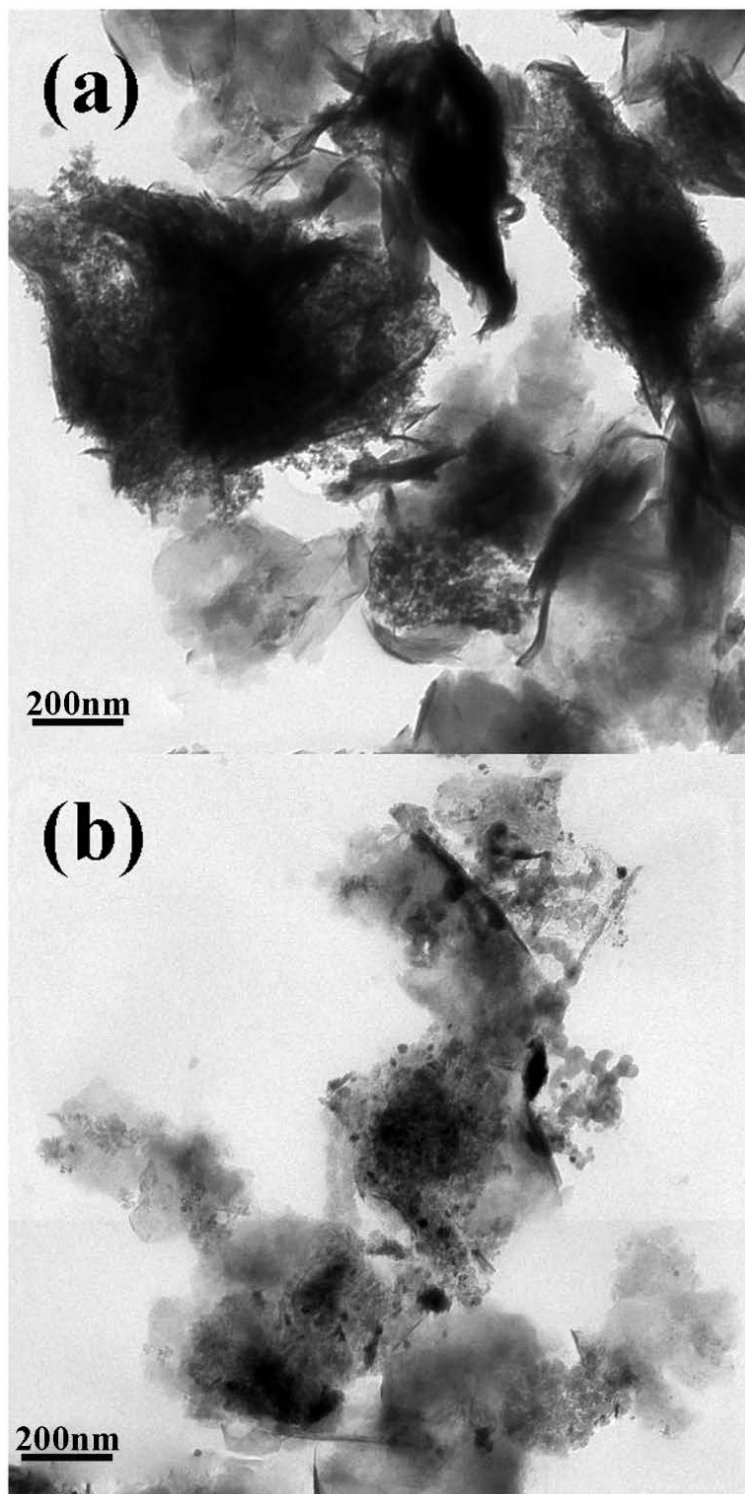

**Figure S6** TEM images of (a) MMT/PANI-1.4/ $\text{Fe}_2\text{O}_3$  and (b) MMT/PANI-1.4/ $\text{Ni}(\text{OH})_2$  composites.

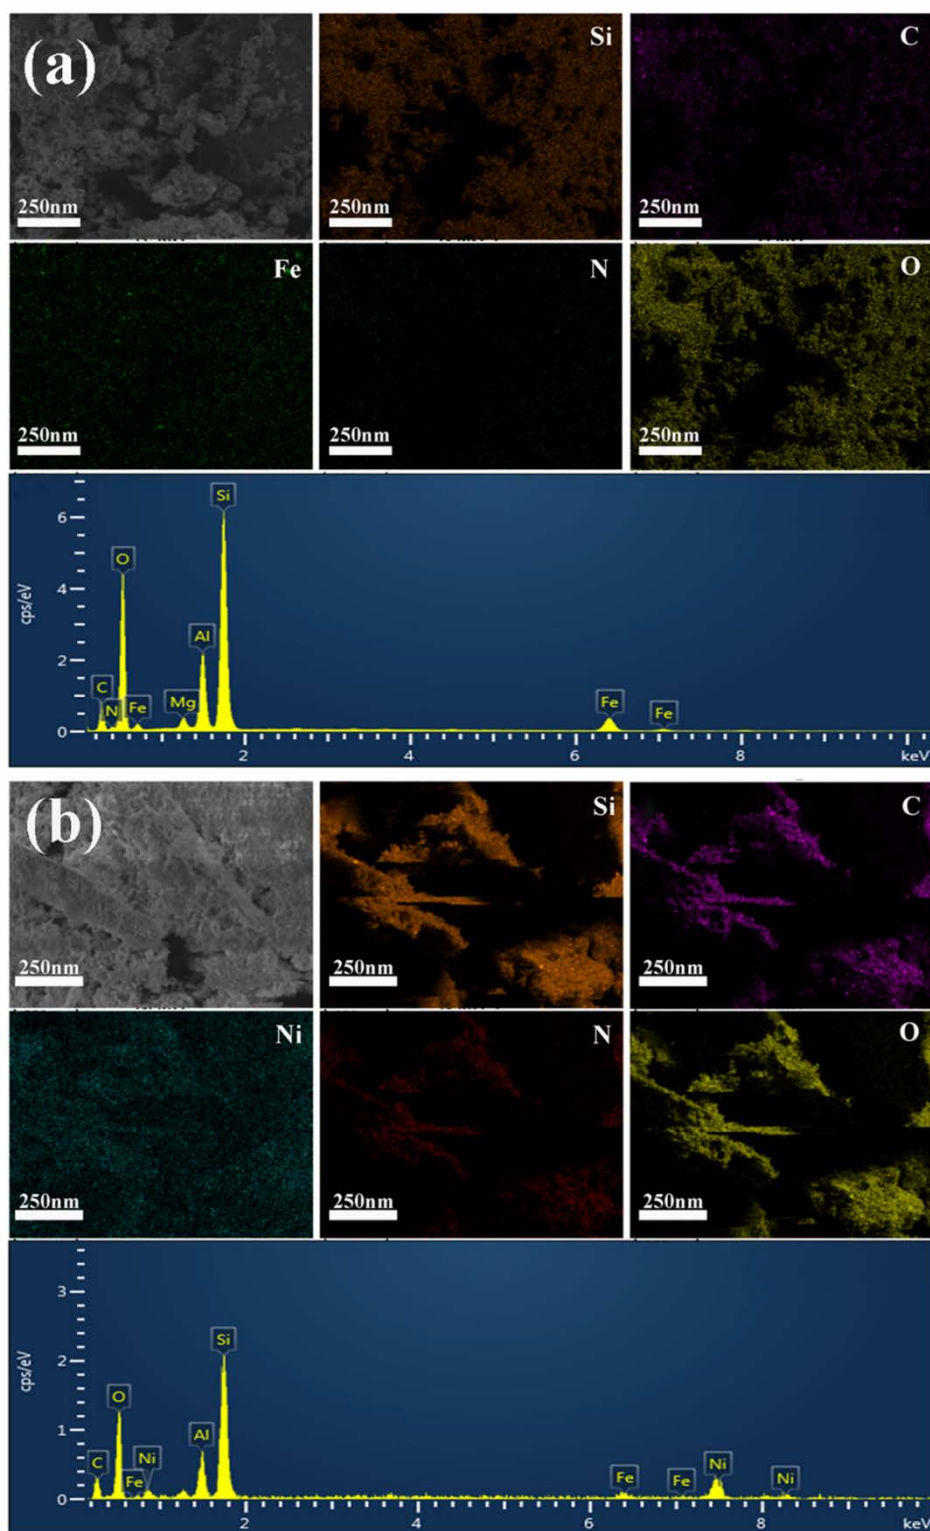

**Figure S7** Element mapping images and EDX curve of (a) MMT/PANI-1.4/Fe<sub>2</sub>O<sub>3</sub> and (b) MMT/PANI-1.4/Ni(OH)<sub>2</sub> composites.

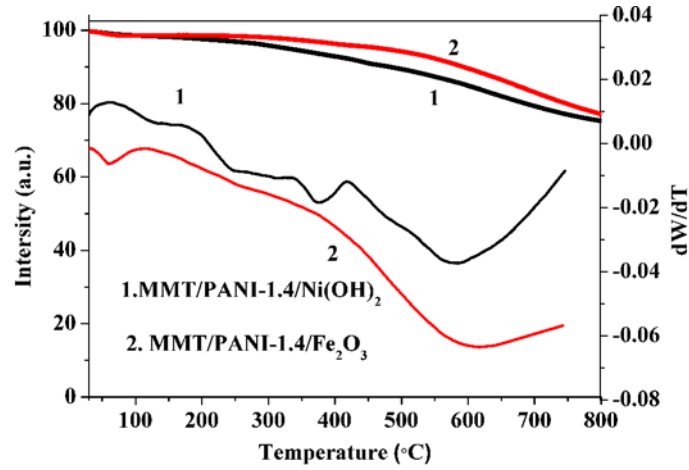

**Figure S8** TG and DTG curves of (1) MMT/PANI-1.4/Ni(OH)<sub>2</sub> and (2) MMT/PANI-1.4/Fe<sub>2</sub>O<sub>3</sub> composites.

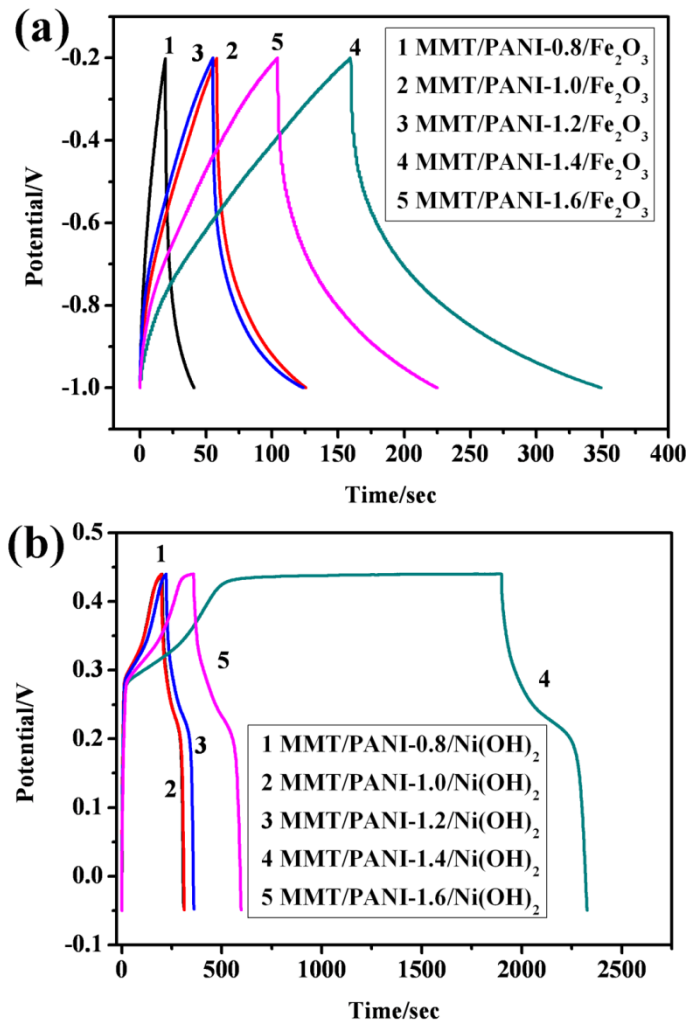

**Figure S9** GCD curves of (a) MMT/PANI-0.8 ~ 1.6/Fe<sub>2</sub>O<sub>3</sub> and (b) MMT/PANI-0.8 ~ 1.6/Ni(OH)<sub>2</sub> composites at current density 0.25 A g<sup>-1</sup> in 1.0 M KOH.
